# Supplementary material
Source: PubMed Central journal article supplement (PMC4058768)
Supplement: NIHMS552983-supplement-Suppl_Data.pdf [file NIHMS552983-supplement-Suppl_Data.pdf]

Figure S1

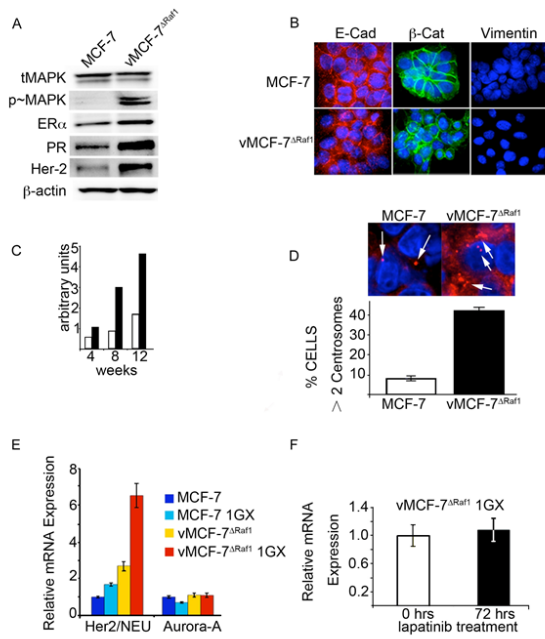

Figure S2

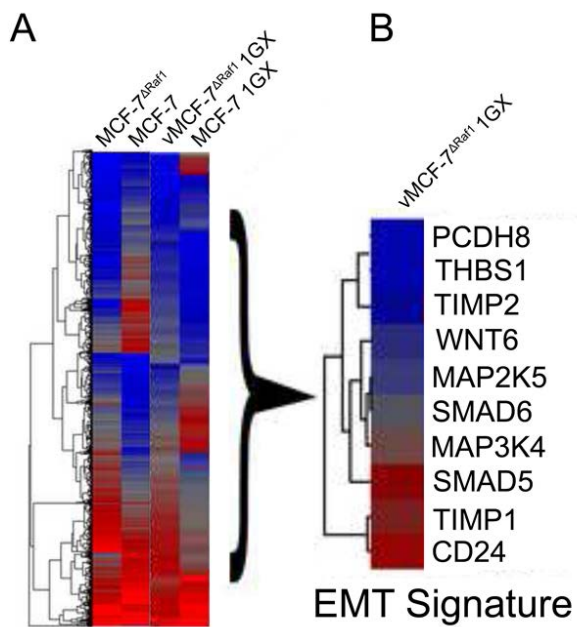

Figure S3

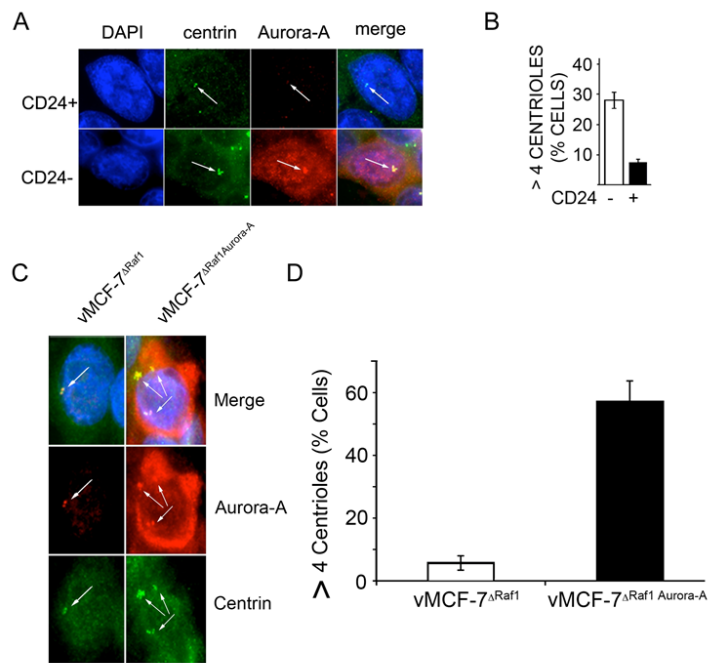

Figure S4

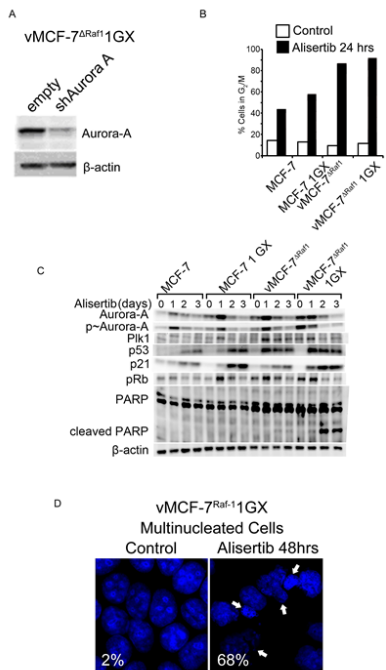

Figure S5

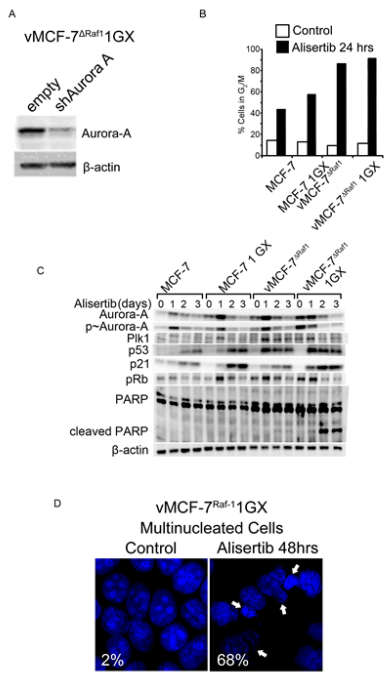

Figure S6

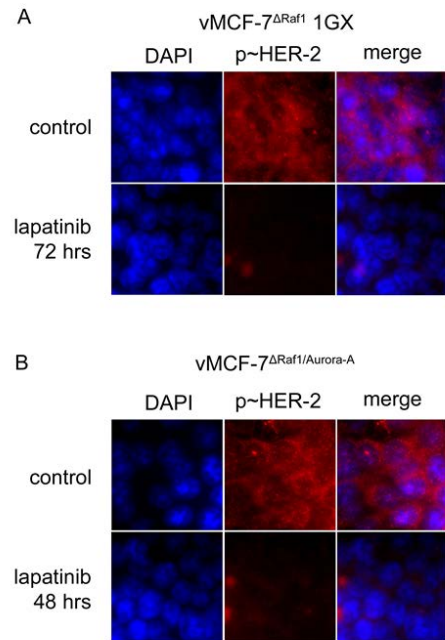

Figure S7

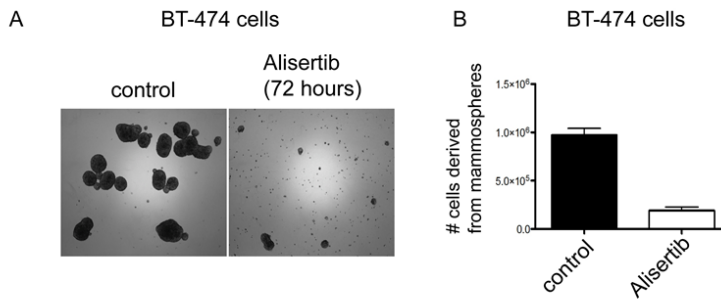

**Figure S1. Molecular Characterization Of Breast Cancer Cells.** (A) Immunoblot analysis of MCF-7 and vMCF-7<sup>ΔRaf-1</sup> cells showing MAPK constitutive phosphorylation, expression of ER and PR and HER-2/Neu over-expression. (B) Immunofluorescence analysis showing expression of E-cadherin (red) and B-catenin (green) and lack of vimentin (green) in MCF-7 and vMCF-7<sup>ΔRaf-1</sup> cells. DNA was labeled in blue with Hoechst dye. (C) Graph showing the area of tumor growth by *NIH Image J program* from three independent experiments. (D) Immunofluorescence analysis showing centrosome amplification in vMCF-7<sup>ΔRaf-1</sup> xenografts. Centrioles were labeled in red with  $\gamma$ -tubulin and DNA was labeled in blue with Hoechst dye. Graph showing the percentage of cells with amplified centrosomes from three independent experiments (+/- s.d.). (E) Graph showing relative mRNA expression by real-time PCR of HER-2/Neu and Aurora-A genes in MCF-7 and variant cells from three independent experiments (+/- s.d.). (F) Graph showing relative mRNA expression by real-time PCR of Aurora-A gene in vMCF-7<sup>ΔRaf-1</sup> 1GX cells before and after treatment with 1 $\mu$ M lapatinib from three independent experiments (+/- s.d.).

**Figure S2. Transcriptome Analysis Of Breast Cancer Cells.** (A) Heat map representing the unsupervised cluster analysis of global gene expression in MCF-7, MCF-7 1GX, vMCF-7<sup>ΔRaf-1</sup> and vMCF-7<sup>ΔRaf-1</sup> 1GX cells. (B) Heat map representing the identification of an EMT signature in vMCF-7<sup>ΔRaf-1</sup> 1GX cells.

**Figure S3. Characterization of Centrosome Phenotype In Breast Cancer Cells.** (A) Immunofluorescence analysis showing the centrosome phenotype in CD24<sup>+</sup> and CD24<sup>-low</sup> cancer cells. The centrosome protein centrin was labeled in green, the mitotic kinase Aurora-A was labeled in red and DNA was labeled in blue with Hoechst dye. (B) Graph showing the percentage of CD24<sup>+</sup> and CD24<sup>-low</sup> cancer cells with amplified centrosomes from three independent experiments (+/- s.d.). (C) Immunofluorescence analysis showing the centrosome phenotype in vMCF-7<sup>ΔRaf-1</sup> and vMCF-7<sup>ΔRaf-1/Aurora-A</sup> cells. The Centrosome protein centrin was labeled in green, the mitotic kinase Aurora-A was labeled in red and DNA was labeled in blue with Hoechst dye. (D) Graph showing the percentage of vMCF-7<sup>ΔRaf-1</sup> and vMCF-7<sup>ΔRaf-1/Aurora-A</sup> cells with amplified centrosomes (> 4 centrioles) from three independent experiments (+/- s.d.).

**Figure S4. Molecular Inhibition Of Aurora-A Kinase Activity *In Vitro*.** (A) Immunoblot analysis showing down-regulation of Aurora-A expression by an shRNA vector in vMCF-7<sup>ΔRaf-1</sup> 1GX cells. (B) Graph displaying cell cycle analysis (FACS) of breast cancer cells showing that treatment with 1μM Alisertib for 24 hours arrested cells in the G2/M phase of the cell cycle. (C) Immunoblot analysis of MCF-7, MCF-7 1GX, vMCF-7<sup>ΔRaf-1</sup> and vMCF-7<sup>ΔRaf-1</sup> 1GX cells showing that treatment with 1μM Alisertib suppressed Aurora-A kinase activity, reduced PLK1 expression and activated the p53 mediated G1/S cell cycle checkpoint. Activation of apoptosis was detected by cleaved PARP only in vMCF-7<sup>ΔRaf-1</sup> 1GX cells. (D) Immunofluorescence analysis showing the development of multinucleated cells following treatment with 1μM Alisertib of vMCF-7<sup>ΔRaf-1</sup> 1GX cells.

**Figure S5. Inhibition of p~HER-2/Neu in Breast Cancer Cells.** (A) Immunofluorescence analysis showing inhibition of p~HER-2/Neu following treatment with 1 $\mu$ M Lapatinib of vMCF-7 <sup>$\Delta$ Raf-1</sup> 1GX cells. (B) Immunofluorescence analysis showing inhibition of p~HER-2/Neu following treatment with 1 $\mu$ M Lapatinib of vMCF-7 <sup>$\Delta$ Raf-1/Aurora-A</sup> cells.

**Figure S6. Inhibition of Mammospheres Growth in BT-474 Breast Cancer Cells.** (A) Light microscopy analysis showing inhibition of mammospheres growth derived from BT-474 breast cancer cells after treatment with 1 $\mu$ M Alisertib for 72 hours. (B) Graph showing the percentage of cells derived from mammospheres before and after treatment with 1 $\mu$ M Alisertib. Experiments were performed in triplicate (+/- s.d.).
